# Supplementary material for: Effects of environmental exposure and lifestyle behaviors on preterm birth and low birth weight among pregnant women in southwest China
Source: Research Square preprint supplement (doi:10.21203/rs.3.rs-7747091/v1), 2025-12-03
Supplement: Supplementary file 1 [file 064db914710a3683acb7dc28.pdf]

## Table 7 Information sheet on births

Natural population cohort survey in southwest China

( birth cohort )

### Birth Status Questionnaire

|                                                                                                                                                                                                                                                                                                                                                                                                                                                                                                                                                                                                                                                                                                                                                                                                                                                       |                                                 |
|-------------------------------------------------------------------------------------------------------------------------------------------------------------------------------------------------------------------------------------------------------------------------------------------------------------------------------------------------------------------------------------------------------------------------------------------------------------------------------------------------------------------------------------------------------------------------------------------------------------------------------------------------------------------------------------------------------------------------------------------------------------------------------------------------------------------------------------------------------|-------------------------------------------------|
| Child code: <input type="text"/> -1-05                                                                                                                                                                                                                                                                                                                                                                                                                                                                                                                                                                                                                                                                                                                                                                                                                |                                                 |
| <p>The first two digits from the left are the survey city (state) code, with a value unit of 0-9;</p> <p>The 3rd and 4th digits are the code of the survey agency, with a value range of 0-9;</p> <p>The 5th to 9th digits are the serial number of pregnant women surveyed, with a range of 0-9; each institution is numbered from 00001;</p> <p>The 10th digit is the identification code of the research subject (1 for mother), 2 for the first child, 3 for the second child (and so on for multiple births); the questionnaire for multiple births should be filled out for each fetus.</p> <p>The 11th and 12th digits are the questionnaire number: baseline Table 01, early pregnancy Table 02, mid-pregnancy Table 03, late pregnancy Table 04, birth Table 05, postpartum and infant Table 06, six months Table 07, one year Table 08.</p> |                                                 |
| Mother's Name: _____ Hospitalization number: Mother's ID number: _____                                                                                                                                                                                                                                                                                                                                                                                                                                                                                                                                                                                                                                                                                                                                                                                |                                                 |
| Child's Name: _____ Mother's mobile phone number: _____                                                                                                                                                                                                                                                                                                                                                                                                                                                                                                                                                                                                                                                                                                                                                                                               |                                                 |
| Name of the survey institution: _____                                                                                                                                                                                                                                                                                                                                                                                                                                                                                                                                                                                                                                                                                                                                                                                                                 |                                                 |
| Investigators signature: _____                                                                                                                                                                                                                                                                                                                                                                                                                                                                                                                                                                                                                                                                                                                                                                                                                        | date : _____ Year ____ On the 1st of this month |
| QC Officer signature: _____                                                                                                                                                                                                                                                                                                                                                                                                                                                                                                                                                                                                                                                                                                                                                                                                                           | date : _____ Year ____ Month ____ Day           |

Natural population birth cohort study in southwest China

Start time of investigation (24-hour system): ☐time ☐component

**Instructions for filling in the form: This form is filled out by doctors from relevant departments of participating institutions.**

### Part I: Births

|     |                                                                                                                                                                                                               |
|-----|---------------------------------------------------------------------------------------------------------------------------------------------------------------------------------------------------------------|
| A01 | Pregnancy: __, Births: __, Gestational age: __, Number of live births: __ 1. Single birth 2. Twins 3. Triplets 4. Quadruplets                                                                                 |
| A02 | Delivery method: __ 1. Natural delivery 2. C-section, Gender: __ 1. Male 2. Female, Date of birth: __                                                                                                         |
| A03 | (The birth length and head circumference are accurate to one decimal place. Fill in according to the contents of the birth certificate)<br>birth weight : ____Kr, body length: __cm, head circumference: __cm |
| A04 | Maternal pregnancy complications: (yes/no) __, History of premature rupture of membranes: (yes/no) __, History of uterine distress: (yes/no) __                                                               |
| A05 | History of asphyxia at birth: (yes/no) __, Apgar score: 1-minute __ score, 5-minute __ score, 10-minute __ component                                                                                          |
| A06 | Sheep water characteristics: __, quantity: ml, umbilical cord: __, Whether there is birth defect: __                                                                                                          |
| A07 | placental expulsion : __ 1. Natural 2. Manual removal 3. Dilation and curettage                                                                                                                               |

### The second part is the status of high risk factor screening

|     |                                                                                               |
|-----|-----------------------------------------------------------------------------------------------|
| B01 | Peak bilirubin: __ μmol/L bacterial meningitis: ____ 1. Yes 2. No                             |
| B02 | Cranioplasty: 1. Ear and external auditory canal 2. Maxilla 3. Palate 4. Others (specify)     |
| B03 | Mechanical feeding for more than 5 days: 1. Yes 2. No, meconium inhalation: ____ 1. Yes 2. No |
| B04 | 21 Trisomy syndrome: ____ 1. Yes 2. No, Turner syndrome: __ 1. Yes 2. No                      |
| B05 | Usher syndrome: __ 1. Yes 2. No, Waardenburg syndrome: __ 1. Yes 2. No                        |

### Part 3 Neonatal hearing screening

|     |                                                                                                   |
|-----|---------------------------------------------------------------------------------------------------|
| C01 | Initial hearing screening time: after birth ____ hour                                             |
| C02 | DPOAE Left ear: __ 1. Passed 2. Not passed, DPOAE Right ear: ____ 1. Passed 2. Not passed         |
| C03 | AABR left ear: 1. Passed 2. Failed AABR right ear: 1. Passed 2. Failed                            |
| C04 | AI Left ear (226 Hz): __ 1. A 2. As 3. Ad 4. B 5. C 6. Other unclassifiable                       |
| C05 | AI right ear (226Hz): 1. A 2. As 3. Ad 4. B 5. C 6. Other unclassifiable                          |
| C06 | AI Left ear (1k Hz): __ 1. Single peak 2. Flat, AI Right ear (1k Hz): ____ 1. Single peak 2. Flat |

### Fourth part of pregnancy ultrasound measurement indicators

|     |                                                                                                                                                            |
|-----|------------------------------------------------------------------------------------------------------------------------------------------------------------|
| D01 | First ultrasound examination (11-13 weeks of gestation): __ Year __ Month __ sun<br>Head and hip length: __, Cervical skin thickness: __, amniotic fluid : |
|-----|------------------------------------------------------------------------------------------------------------------------------------------------------------|

|     |                                                                                                                                                                                                                                                                                                                                                                                                                                                                   |
|-----|-------------------------------------------------------------------------------------------------------------------------------------------------------------------------------------------------------------------------------------------------------------------------------------------------------------------------------------------------------------------------------------------------------------------------------------------------------------------|
| D02 | <p>Second ultrasound examination (22-24 weeks of gestation): _ Year _ month ____sun</p> <p>biparietal diameter : _____, Posterior ventricular horns:____, head circumference : _____, Femur diameter: _____, Abdominal circumference: _____</p> <p>Goat water: _____, Placenta and umbilical blood flow S/D:____, RI : _____, Cross-road: Heart____、 thorax _Left atrium, Right atrium_、 left ventricle _、 right ventricle _、 pulmonary artery _、 aorta _____</p> |
| D03 | <p>Third ultrasound examination (28-31 weeks of gestation): ____year ____moon ____sun</p> <p>biparietal diameter : __, head circumference : __, Stock diameter:__, circumference of abdomen : __ , amniotic fluid : _____</p> <p>, Placenta and umbilical blood flow S / D:____, RI: _____, Diameter: Heart____、 thorax _____、 atria sinistrum _____、 atrium dextrum _____、 left ventricle _____、 right ventricle _____、 pulmonary artery _____、 aorta _____</p>  |
| D04 | <p>Fourth ultrasound examination (36-40 weeks of gestation): _ Year _ month ____sun</p> <p>biparietal diameter : _____, Femur diameter:____, Abdominal circumference:_____ , amniotic fluid : _____</p> <p>, Placenta and umbilical blood flow S/D:____, RI:____ , Cross-Width: Heart____、 Thorax _____、 atria sinistrum _____right chamber, left chamber, right chamber____、 pulmonary artery _____、 aorta _____</p>                                             |

End time of investigation (24-hour system): ☐time ☐component
