# Supplementary material for: Effects of environmental exposure and lifestyle behaviors on preterm birth and low birth weight among pregnant women in southwest China
Source: Research Square preprint supplement (doi:10.21203/rs.3.rs-7747091/v1), 2025-12-03
Supplement: Supplementary file 2 [file 3e7f29e9f496a8cbbd5190ab.pdf]

Table 4 Early pregnancy questionnaire

Natural Population Cohort Survey in Southwest  
China  
  
( birth cohort )

Early Pregnancy Survey

|                                                                                                                                                                                                                                                                                                                                                                                                                                                                                                                                                                                                                                                                                                                                                                                                                                                            |                                   |
|------------------------------------------------------------------------------------------------------------------------------------------------------------------------------------------------------------------------------------------------------------------------------------------------------------------------------------------------------------------------------------------------------------------------------------------------------------------------------------------------------------------------------------------------------------------------------------------------------------------------------------------------------------------------------------------------------------------------------------------------------------------------------------------------------------------------------------------------------------|-----------------------------------|
| Personal code: ...-...-.....-□1-□0□2                                                                                                                                                                                                                                                                                                                                                                                                                                                                                                                                                                                                                                                                                                                                                                                                                       |                                   |
| <p>The first 1-2 digits from the left are the survey city (state) code, with a value unit of 0-9;</p> <p>The third and fourth digits are the code of the survey agency, with a value range of 0-9;</p> <p>The 5th to 9th digits are the serial number of pregnant women surveyed, with a range of 0-9; each institution is numbered from 00001;</p> <p>The 10th digit is the identification code of the research subject (1 for mother), 2 for the first child, 3 for the second child (and so on for multiple births); the questionnaire for multiple births should be filled out for each fetus.</p> <p>The 11th and 12th digits are the questionnaire number: Baseline Table 01, Early Pregnancy Table 02, Mid-Pregnancy Table 03, Late Pregnancy Table 04, Birth Table 05, Postpartum and Infant Table 06, Six Months Table 07, One Year Table 08.</p> |                                   |
| Name of pregnant woman: _____ Current gestational age: _____ cell-phone number : _____                                                                                                                                                                                                                                                                                                                                                                                                                                                                                                                                                                                                                                                                                                                                                                     |                                   |
| Pregnant ID number: □ □ □ □ □ □ □ □ □ □ □ □ □ □ □ □ □ □                                                                                                                                                                                                                                                                                                                                                                                                                                                                                                                                                                                                                                                                                                                                                                                                    |                                   |
| Name of the survey institution: _____                                                                                                                                                                                                                                                                                                                                                                                                                                                                                                                                                                                                                                                                                                                                                                                                                      |                                   |
| Investigators signature: _____                                                                                                                                                                                                                                                                                                                                                                                                                                                                                                                                                                                                                                                                                                                                                                                                                             | date : _____year ____moon ____sun |
| QC Officer signature: _____                                                                                                                                                                                                                                                                                                                                                                                                                                                                                                                                                                                                                                                                                                                                                                                                                                | date : _____year ____moon ____sun |

Start time of investigation (24-hour system): ☐ time ☐ component

## Part I: Lifestyle and environmental exposures

### A. smoke

|     |                                                                                                                                                                                                                                                                                                                                                                                                                                                                                                                                                                 |
|-----|-----------------------------------------------------------------------------------------------------------------------------------------------------------------------------------------------------------------------------------------------------------------------------------------------------------------------------------------------------------------------------------------------------------------------------------------------------------------------------------------------------------------------------------------------------------------|
| A01 | <p>Have you ever smoked frequently (at least one cigarette a day for more than one month)? 0 No (please jump to A05) 1. Yes →</p> <p>A02. When did you start smoking regularly? ____ year__ Month (fill in the range from 10 years old to no more than age)</p> <p>A03. How many cigarettes do you usually smoke a day when you smoke regularly?_ Branch/day (fill in the range 1 to 30)</p> <p>A04. Have you stopped smoking_____ 0. No (go to A05) 1. Yes, when did you stop smoking? ____ year_ Month (fill in the range not exceeding the current date)</p> |
|-----|-----------------------------------------------------------------------------------------------------------------------------------------------------------------------------------------------------------------------------------------------------------------------------------------------------------------------------------------------------------------------------------------------------------------------------------------------------------------------------------------------------------------------------------------------------------------|

Instructions for filling in the form: Exposure to smoking environment: refers to passive inhalation of cigarette smoke in various situations (home, workplace or entertainment place), regardless of the length of time.

|     |                                                                                                                                                                                                                                                                                                                                                                                                                                                                     |
|-----|---------------------------------------------------------------------------------------------------------------------------------------------------------------------------------------------------------------------------------------------------------------------------------------------------------------------------------------------------------------------------------------------------------------------------------------------------------------------|
| A05 | <p>Have you been exposed to smoke since becoming pregnant?_____ 0 No (Please jump to B01) 1. Yes→</p> <p>A06. Does your family smoke in front of you?_____ 0 No (please jump to A08) 1 Yes</p> <p>A07. How long does he usually smoke in front of you every day?____Hours/day</p> <p>A08. Do people smoke in front of you in your work environment and public places? ____ 0 No (please jump to B01) 1. Yes A09. Average weekly exposure to smoke____Hours/week</p> |
|-----|---------------------------------------------------------------------------------------------------------------------------------------------------------------------------------------------------------------------------------------------------------------------------------------------------------------------------------------------------------------------------------------------------------------------------------------------------------------------|

### B. drink

| B01                | Have you ever had alcohol regularly? (meaning at least once a week on average)____ 0 No (please skip C01) 1. Yes →                                                                                                                                                                                                                                                                                                                                                                                                                                                                     |                                          |           |                                          |           |  |  |                    |  |  |              |  |  |           |  |  |             |  |  |
|--------------------|----------------------------------------------------------------------------------------------------------------------------------------------------------------------------------------------------------------------------------------------------------------------------------------------------------------------------------------------------------------------------------------------------------------------------------------------------------------------------------------------------------------------------------------------------------------------------------------|------------------------------------------|-----------|------------------------------------------|-----------|--|--|--------------------|--|--|--------------|--|--|-----------|--|--|-------------|--|--|
| B02                | <p>When did you start drinking regularly? ____ days</p> <table border="1" style="width: 100%;"> <thead> <tr> <th style="width: 33%;">Wine varieties</th> <th style="width: 33%;">Next/Week</th> <th style="width: 33%;">Two/once (1 tael is about equal to 50ml)</th> </tr> </thead> <tbody> <tr> <td>B03. Beer</td> <td></td> <td></td> </tr> <tr> <td>B04. Foreign wines</td> <td></td> <td></td> </tr> <tr> <td>B05. Spirits</td> <td></td> <td></td> </tr> <tr> <td>B06. Wine</td> <td></td> <td></td> </tr> <tr> <td>B07. Shochu</td> <td></td> <td></td> </tr> </tbody> </table> | Wine varieties                           | Next/Week | Two/once (1 tael is about equal to 50ml) | B03. Beer |  |  | B04. Foreign wines |  |  | B05. Spirits |  |  | B06. Wine |  |  | B07. Shochu |  |  |
| Wine varieties     | Next/Week                                                                                                                                                                                                                                                                                                                                                                                                                                                                                                                                                                              | Two/once (1 tael is about equal to 50ml) |           |                                          |           |  |  |                    |  |  |              |  |  |           |  |  |             |  |  |
| B03. Beer          |                                                                                                                                                                                                                                                                                                                                                                                                                                                                                                                                                                                        |                                          |           |                                          |           |  |  |                    |  |  |              |  |  |           |  |  |             |  |  |
| B04. Foreign wines |                                                                                                                                                                                                                                                                                                                                                                                                                                                                                                                                                                                        |                                          |           |                                          |           |  |  |                    |  |  |              |  |  |           |  |  |             |  |  |
| B05. Spirits       |                                                                                                                                                                                                                                                                                                                                                                                                                                                                                                                                                                                        |                                          |           |                                          |           |  |  |                    |  |  |              |  |  |           |  |  |             |  |  |
| B06. Wine          |                                                                                                                                                                                                                                                                                                                                                                                                                                                                                                                                                                                        |                                          |           |                                          |           |  |  |                    |  |  |              |  |  |           |  |  |             |  |  |
| B07. Shochu        |                                                                                                                                                                                                                                                                                                                                                                                                                                                                                                                                                                                        |                                          |           |                                          |           |  |  |                    |  |  |              |  |  |           |  |  |             |  |  |
| B08                | Have you stopped drinking regularly_____ 0. Yes he (jump to C01) 1. Is it the time of stopping regular drinking Year Month                                                                                                                                                                                                                                                                                                                                                                                                                                                             |                                          |           |                                          |           |  |  |                    |  |  |              |  |  |           |  |  |             |  |  |

### C. drink tea

|     |                                                                                                                                                                                                                                                                                                                                                                                                                                                                                            |
|-----|--------------------------------------------------------------------------------------------------------------------------------------------------------------------------------------------------------------------------------------------------------------------------------------------------------------------------------------------------------------------------------------------------------------------------------------------------------------------------------------------|
| C01 | <p>Do you drink tea regularly (at least 3 times a week)?_____ 0 No (please jump to D01) 1. Yes →</p> <p>C02. When did you start drinking tea regularly? Year Month</p> <p>C03. What kind of tea do you drink? ____ (Choose one) 1. Green tea 2. Black tea 3. Oolong tea 4. Camellia 5. Black tea The amount of green tea is similar to that of black tea 6. The amount of green tea is similar to that of camellia 7. The amount of black tea is similar to that of camellia 8. Others</p> |
|-----|--------------------------------------------------------------------------------------------------------------------------------------------------------------------------------------------------------------------------------------------------------------------------------------------------------------------------------------------------------------------------------------------------------------------------------------------------------------------------------------------|

|                                                                                                                                                               |                                                                                                                                                                                                                                                                                                                                                                                                                                                                                                                                                                                                                                                                                                                                                                                                                                                                                                                                                                                         |
|---------------------------------------------------------------------------------------------------------------------------------------------------------------|-----------------------------------------------------------------------------------------------------------------------------------------------------------------------------------------------------------------------------------------------------------------------------------------------------------------------------------------------------------------------------------------------------------------------------------------------------------------------------------------------------------------------------------------------------------------------------------------------------------------------------------------------------------------------------------------------------------------------------------------------------------------------------------------------------------------------------------------------------------------------------------------------------------------------------------------------------------------------------------------|
|                                                                                                                                                               | C04. Have you stopped drinking tea regularly _____ 0 No (jump to D01) 1 Yes, stop regular tea time <u>Year</u> <u>Month</u>                                                                                                                                                                                                                                                                                                                                                                                                                                                                                                                                                                                                                                                                                                                                                                                                                                                             |
| <b><u>D. alima</u></b>                                                                                                                                        |                                                                                                                                                                                                                                                                                                                                                                                                                                                                                                                                                                                                                                                                                                                                                                                                                                                                                                                                                                                         |
| D01                                                                                                                                                           | Did you take vitamin or mineral supplements (such as folic acid, Fosif, calcium tablets, iron supplements, etc.) frequently during the year before pregnancy? _____ 0 No (please jump to D03) 1. Yes →                                                                                                                                                                                                                                                                                                                                                                                                                                                                                                                                                                                                                                                                                                                                                                                  |
| D02                                                                                                                                                           | <p>Please write down the name of the vitamin or mineral supplement you take regularly, when you take it and how often you usually take it a week.</p> <p>1. Folic <u>acid</u> (1 Folic acid tablets 2 Ailovee 3 Materna 4 Not known), weekly _____ Next, co-servicing _____ circumference</p> <p>2. Fukuroto (1 _____ 2 (Not clear), weekly _____ Next, co-servicing _____ circumference</p> <p>3. Calcium <u>tablets</u> (1 calcium carbonate D3 tablet 2 calcium carbonate D3 granules 3 calcium acetate capsules 4 calcium lactate granules 5 calcium gluconate zinc oral solution 6 unknown), weekly _____ Next, co-servicing _____ circumference</p> <p>4. Iron <u>supplements</u> (1 polysaccharide iron complex capsules 2 dextran iron oral solution 3 ferrous lactate capsules 4 protein succinate iron oral solution 5 ferrous succinate sustained-release tablets 6 unknown), weekly _____ Next, co-servicing _____ circumference</p> <p>5. Other: Please indicate _____</p> |
| D03                                                                                                                                                           | Have you taken any vitamins or mineral supplements since this pregnancy? _____ 0. No (please jump to E01) 1. Yes→                                                                                                                                                                                                                                                                                                                                                                                                                                                                                                                                                                                                                                                                                                                                                                                                                                                                       |
| D04                                                                                                                                                           | <p>Please write down the name of the vitamin or mineral supplement you take regularly, when you take it and how many times a week.</p> <p>1. Vitamin <u>1</u>. Ailove 2. Martina 3. Not sure weekly _____ Next, a total of _____ weeks</p> <p>2. Minerals 1. <u>Ailovee</u> 2. Materna 3. Not known weekly _____ Next, co-servicing _____ circumference</p> <p>3. Other: Please indicate _____</p>                                                                                                                                                                                                                                                                                                                                                                                                                                                                                                                                                                                      |
| <b><u>E. Sports activities and electronic product use</u></b>                                                                                                 |                                                                                                                                                                                                                                                                                                                                                                                                                                                                                                                                                                                                                                                                                                                                                                                                                                                                                                                                                                                         |
| Note: Average walking time per session, computer/TV time per day, etc., are estimated values. For example, if the time is about 2-3 hours, fill in 2.5 hours. |                                                                                                                                                                                                                                                                                                                                                                                                                                                                                                                                                                                                                                                                                                                                                                                                                                                                                                                                                                                         |
| E01                                                                                                                                                           | Have you been walking since becoming pregnant? _____ 0. No 1.. Yes average weekly walk _____ Next time, every time _____ 2 hours a day. Yes, but not clear                                                                                                                                                                                                                                                                                                                                                                                                                                                                                                                                                                                                                                                                                                                                                                                                                              |
| E02                                                                                                                                                           | Since becoming pregnant, have you been physically active (excluding walking, at least 3 times a week for at least 30 minutes each time)? _____ 0 No 1 Yes                                                                                                                                                                                                                                                                                                                                                                                                                                                                                                                                                                                                                                                                                                                                                                                                                               |
| E03                                                                                                                                                           | Since becoming pregnant, you've been using your computer on average every day _____ hour                                                                                                                                                                                                                                                                                                                                                                                                                                                                                                                                                                                                                                                                                                                                                                                                                                                                                                |
| E04                                                                                                                                                           | Since becoming pregnant, you watch TV on average every day _____ hour                                                                                                                                                                                                                                                                                                                                                                                                                                                                                                                                                                                                                                                                                                                                                                                                                                                                                                                   |
| E05                                                                                                                                                           | Have you worn a radiation suit since you were pregnant? _____ 0 No (please jump to F01) 1 Yes                                                                                                                                                                                                                                                                                                                                                                                                                                                                                                                                                                                                                                                                                                                                                                                                                                                                                           |
| E06                                                                                                                                                           | How often do you wear a radiation suit on average every day? _____ hour                                                                                                                                                                                                                                                                                                                                                                                                                                                                                                                                                                                                                                                                                                                                                                                                                                                                                                                 |
| <b><u>F. occupational exposure</u></b>                                                                                                                        |                                                                                                                                                                                                                                                                                                                                                                                                                                                                                                                                                                                                                                                                                                                                                                                                                                                                                                                                                                                         |
| F01                                                                                                                                                           | Have you ever worked _____ 0. Does it jump to G01 1. Yes (how many times the work has exceeded half a year 1 time 2 times 3 times)                                                                                                                                                                                                                                                                                                                                                                                                                                                                                                                                                                                                                                                                                                                                                                                                                                                      |

| Please fill in your current and past work information (if you have worked for less than six months, do not fill in, starting from the most recent job) |                                                                                                                                                                                                                                                |                                                                  |                                                                  |                                                                  |
|--------------------------------------------------------------------------------------------------------------------------------------------------------|------------------------------------------------------------------------------------------------------------------------------------------------------------------------------------------------------------------------------------------------|------------------------------------------------------------------|------------------------------------------------------------------|------------------------------------------------------------------|
| Title                                                                                                                                                  | question                                                                                                                                                                                                                                       | Job 1                                                            | Work 2                                                           | Work 3                                                           |
| F02                                                                                                                                                    | Name of your work unit                                                                                                                                                                                                                         |                                                                  |                                                                  |                                                                  |
| F03                                                                                                                                                    | Address of your work unit                                                                                                                                                                                                                      | _market _distinguish _street                                     | _market _distinguish _street                                     | _market _distinguish _street                                     |
| F04                                                                                                                                                    | What is your job position?                                                                                                                                                                                                                     |                                                                  |                                                                  |                                                                  |
| F05                                                                                                                                                    | Please describe the specific tasks of your work                                                                                                                                                                                                |                                                                  |                                                                  |                                                                  |
| F06                                                                                                                                                    | When did you start this job?                                                                                                                                                                                                                   | __year __moon                                                    | __year __moon                                                    | __year __moon                                                    |
| F07                                                                                                                                                    | When will you finish this work? (Unfinished Bundling 99)                                                                                                                                                                                       | __year __moon                                                    | __year __moon                                                    | __year __moon                                                    |
| F08                                                                                                                                                    | Which of the following best describes the intensity of physical activity required for your job?                                                                                                                                                | 1. Sitting dominates 2. Small amounts<br>3. Intermediate 4. High | 1. Sitting dominates 2. Small amounts<br>3. Intermediate 4. High | 1. Sitting dominates 2. Small amounts<br>3. Intermediate 4. High |
| F09                                                                                                                                                    | Whether your work requires an overnight shift                                                                                                                                                                                                  | 0. No 1 Yes                                                      | 0. No 1 Yes                                                      | 0. No 1 Yes                                                      |
| F10                                                                                                                                                    | Your daily working hours since pregnancy: ____ Hours (0 for non-working)                                                                                                                                                                       |                                                                  |                                                                  |                                                                  |
| F11                                                                                                                                                    | What is your most commonly used transportation for work and travel? (Multiple choices)<br>A. Walking B. Bicycle/electric vehicle C. Bus D. Subway E. Car F. Bicycle                                                                            |                                                                  |                                                                  |                                                                  |
| F12                                                                                                                                                    | Time from home to work: On foot ____ Hourly rides ____ hour                                                                                                                                                                                    |                                                                  |                                                                  |                                                                  |
| F13                                                                                                                                                    | You work in a noisy factory, bar, or are often exposed to loud noise: ____ 0. No (go to F15) 1. Yes→                                                                                                                                           |                                                                  |                                                                  |                                                                  |
| F14                                                                                                                                                    | How loud is the noise: ____ 1. Most of the time it is not large 2. Can hear the sound of speech, the noise is loud 3. Can not hear the sound of speech, can tolerate 4. Can not hear the sound of speech, the noise is unbearable 5. Uncertain |                                                                  |                                                                  |                                                                  |
| F15                                                                                                                                                    | Have you been exposed to dust in your work (including field work)? (Dust refers to dust, smoke, smoke, mineral dust, sand dust, powder, etc. in the working environment): ____ 0 No 1 Yes 2. Don't know                                        |                                                                  |                                                                  |                                                                  |
| F16                                                                                                                                                    | Have you been exposed to harmful gases (e.g., gasoline, pesticides, cooking fumes, ammonia, sulfur dioxide, carbon monoxide, mercury, benzene, hydrogen sulfide, etc.) at work (including in the field)? ____ 0 No 1 Yes 2. Don't know         |                                                                  |                                                                  |                                                                  |
| <b><u>G. Home-based living</u></b>                                                                                                                     |                                                                                                                                                                                                                                                |                                                                  |                                                                  |                                                                  |
| Please provide information about the housing you have lived in from the 12 months prior to pregnancy until now.                                        |                                                                                                                                                                                                                                                |                                                                  |                                                                  |                                                                  |
| How many places have you lived since 12 months before pregnancy? ____ (1. One 2. Two 3. Three)                                                         |                                                                                                                                                                                                                                                |                                                                  |                                                                  |                                                                  |
| Title                                                                                                                                                  | question                                                                                                                                                                                                                                       | (1) Current residence                                            | (2) Last residence                                               |                                                                  |

|     |                                                                                                                              |                                                                                                                                                                                       |                                                                                                                            |
|-----|------------------------------------------------------------------------------------------------------------------------------|---------------------------------------------------------------------------------------------------------------------------------------------------------------------------------------|----------------------------------------------------------------------------------------------------------------------------|
| G01 | Name of city, district and street                                                                                            | market : __distinguish : __street : __                                                                                                                                                | market : __distinguish : __street : __                                                                                     |
| G02 | Start time of residence                                                                                                      | __year __moon __sun                                                                                                                                                                   | __year __moon __sun                                                                                                        |
| G03 | floor space                                                                                                                  | 2 __m                                                                                                                                                                                 | 2 _____m                                                                                                                   |
| G04 | Residential floor                                                                                                            | _____layer                                                                                                                                                                            | _____layer                                                                                                                 |
| G05 | The residence is close to the main traffic road (four lanes in both directions)                                              | 1. <50m 2.50-100m<br>3. 101-150m4. >150m                                                                                                                                              | 1. <50m 2.50-100m<br>3. 101-150m4. >150m                                                                                   |
| G06 | Do you cook at your residence? ____ 0. No (go to G09) 1. Yes<br>→ What fuel do you mainly use for cooking at this residence? | 1. Gas or natural gas 2. Coal briquettes or coal balls<br>3. Electric or induction cooker 4 Other_                                                                                    | 1. Gas or natural gas 2. Coal briquettes or coal balls<br>3. Electric or induction cooker 4. Others_                       |
| G07 | What is the cooking oil you use most often at home?                                                                          | 1. Vegetable oil 2. Lard 3. Peanut oil 4. Soybean oil<br>5. Molting oil 6. Other oils                                                                                                 | 1. Vegetable oil 2. Lard 3. Peanut oil 4. Soybean oil<br>5. Molting oil 6. Other oils                                      |
| G08 | Do you use a range hood when cooking?                                                                                        | 0. No 1 Yes                                                                                                                                                                           | 0. No 1 Yes                                                                                                                |
| G09 | Last renovation completed (can be filled in with month and day if you don't know the date 99)                                | __year __moon __sun                                                                                                                                                                   | __year __moon __sun                                                                                                        |
| G10 | The decoration materials used in your home (multiple choices)                                                                | A paint B wallpaper C artificial board D glue E solid wood F paint G marble H granite I others (please make a footnote )__                                                            | A paint B wallpaper C artificial board D glue E solid wood F paint G marble H granite I others (please make a footnote )__ |
| G11 | Can you smell the decoration when you move in after decorating your house?                                                   | Mild refers to the smell of decoration, moderate refers to the irritation, and severe refers to the occurrence of dizziness and other symptoms<br>0. No 1. Mild 2. Moderate 3. Severe |                                                                                                                            |
| G12 | The last time I bought furniture                                                                                             | __year __moon __sun                                                                                                                                                                   | __year __moon __sun                                                                                                        |
| G13 | Materials of your furniture (multiple choices)                                                                               | A artificial board B solid wood C glass D others                                                                                                                                      | A artificial board B solid wood C glass D others                                                                           |
| G14 | How long your house has its Windows open                                                                                     | Working days: __ hours/day;<br>Non-working day: __ hours/day                                                                                                                          | Working days: __ hours/day;<br>Non-working day: __ hours/day                                                               |
| G15 | Does your home use air purification facilities                                                                               | 0. No (please jump to G17) 1. Yes                                                                                                                                                     | 0. No (please jump to G15) 1. Yes                                                                                          |
| G16 | When you use air purification facilities at home                                                                             | Working days: __ hours/day;                                                                                                                                                           | Working days: __ hours/day;                                                                                                |

|                                                                                                |                                                                                                                                                                                                                                                      |                                                                                                         |                                                                                                       |
|------------------------------------------------------------------------------------------------|------------------------------------------------------------------------------------------------------------------------------------------------------------------------------------------------------------------------------------------------------|---------------------------------------------------------------------------------------------------------|-------------------------------------------------------------------------------------------------------|
|                                                                                                | Be-<br>tween                                                                                                                                                                                                                                         | Non-working day: __ hours/day                                                                           | Non-working day: __ hours/day                                                                         |
| G17                                                                                            | Does your home have heating (including air conditioning, electric heaters, coal stoves, etc.)                                                                                                                                                        | 0. No (please jump to G21) 1. Yes                                                                       | 0. No (please jump to G21) 1. Yes                                                                     |
| G18                                                                                            | When your home heating started (if you can't remember answer 99) (Form instructions: Residence starts 12 months before pregnancy)                                                                                                                    | __year __moon __sun                                                                                     | __year __moon __sun                                                                                   |
| G19                                                                                            | When did you finish heating your house (I can't remember answer 99)                                                                                                                                                                                  | __year __moon __sun                                                                                     | __year __moon __sun                                                                                   |
| G20                                                                                            | Please choose your home heating method: (multiple choices)                                                                                                                                                                                           | A coal stove, with chimney B coal stove, without chimney C electric heater D air conditioner E others__ | A coal stove, with chimney B coal stove, without chimney C electric heater D air conditioner E others |
| G21                                                                                            | Do you have pets at home                                                                                                                                                                                                                             | 0. No 1. Yes please explain                                                                             | 0. No 1. Yes please explain__                                                                         |
| G22                                                                                            | Since you became pregnant, the average time your family spends cooking (breakfast, lunch, dinner) is: __ Hours (total time)<br>Since you became pregnant, your average daily time spent cooking (breakfast, lunch, dinner) is: __ Hours (total time) |                                                                                                         |                                                                                                       |
| G23                                                                                            | Since you became pregnant, what is your average daily time spent at home (including sleep and other activities)? Workdays __ Hours of rest __ hour                                                                                                   |                                                                                                         |                                                                                                       |
| G24                                                                                            | Have you ever dyed or permed your hair since you were pregnant? __ 0 No 1 Yes                                                                                                                                                                        |                                                                                                         |                                                                                                       |
| G25                                                                                            | Since you were pregnant, have you been wearing makeup regularly? __ (Including contact lipsticks, nail polish, cosmetics, etc.) 0. No 1. Yes                                                                                                         |                                                                                                         |                                                                                                       |
| Part II. Medication history during pregnancy                                                   |                                                                                                                                                                                                                                                      |                                                                                                         |                                                                                                       |
| H01                                                                                            | Have you had any vaginal bleeding since becoming pregnant: __ 0. No---Transition to H02 1. Yes                                                                                                                                                       |                                                                                                         |                                                                                                       |
|                                                                                                | Whether medication is used __, 0 No 1 Yes, __ Use of drugs 2. Unclear                                                                                                                                                                                |                                                                                                         |                                                                                                       |
|                                                                                                | 2 Yes, severe (from the first trimester of pregnancy __ Zhouji to the 1st __ circumference )<br>Whether medication is used __, 0 No (jump to H02) 1 Yes, __ Use of drugs 2. Unclear                                                                  |                                                                                                         |                                                                                                       |
| Drug name (1 specific name 2 unknown)                                                          |                                                                                                                                                                                                                                                      | Dosage and frequency of medication (how many tablets/bags, how often per day)                           | Number of days actually used in first medication (gestational week)                                   |
|                                                                                                |                                                                                                                                                                                                                                                      |                                                                                                         | be pregnant __<br>circumference                                                                       |
| 3. If so, reason: __ (1 Threatened abortion 2 placenta previa 3 placental abruption 4. Others) |                                                                                                                                                                                                                                                      |                                                                                                         |                                                                                                       |

|                                                                                                                                                                                 |                                                                                                                                                                                                                                                                                                                                                                                                                                         |                                                                               |                                                                     |
|---------------------------------------------------------------------------------------------------------------------------------------------------------------------------------|-----------------------------------------------------------------------------------------------------------------------------------------------------------------------------------------------------------------------------------------------------------------------------------------------------------------------------------------------------------------------------------------------------------------------------------------|-------------------------------------------------------------------------------|---------------------------------------------------------------------|
| H02                                                                                                                                                                             | Have you had any vomiting since you became pregnant ____ 0. F---jump to H03<br><br>1. Yes, mild (from the first trimester of pregnancy ____ Zhouji to the 1st ____ Week) whether medication was used ____, 0. No (go to H03) 1. Yes, ____ Drugs<br><br>2. Yes, severe (from the first trimester of pregnancy ____ Zhouji to the 1st ____ Week) whether medication was used ____, 0. No (go to H03) 1. Yes, ____ Use of drugs 2. Unclear |                                                                               |                                                                     |
| Drug name (1 specific name 2 unknown)                                                                                                                                           |                                                                                                                                                                                                                                                                                                                                                                                                                                         | Dosage and frequency of medication (how many tablets/bags, how often per day) | Number of days actually used in first medication (gestational week) |
|                                                                                                                                                                                 |                                                                                                                                                                                                                                                                                                                                                                                                                                         |                                                                               | be pregnant ____<br>circumference                                   |
|                                                                                                                                                                                 |                                                                                                                                                                                                                                                                                                                                                                                                                                         |                                                                               | be pregnant ____<br>circumference                                   |
|                                                                                                                                                                                 |                                                                                                                                                                                                                                                                                                                                                                                                                                         |                                                                               | be pregnant ____<br>circumference                                   |
| Instructions for filling in the form: Fever refers to a regulatory increase in body temperature (more than 0.5°C) caused by the action of pyrogens on the temperature set point |                                                                                                                                                                                                                                                                                                                                                                                                                                         |                                                                               |                                                                     |
| H03                                                                                                                                                                             | Have you had a fever since becoming pregnant ____ 0. No (please jump to H04) 1. Yes, the highest temperature is ____,<br>last ____ Heaven; Whether to use medication ____ 0 No 1 Yes ____ Species, 2. Not clear                                                                                                                                                                                                                         |                                                                               |                                                                     |
| Drug name (1 specific name 2 unknown)                                                                                                                                           |                                                                                                                                                                                                                                                                                                                                                                                                                                         | Dosage and frequency of medication (how many tablets/bags, how often per day) | Number of days actually used in first medication (gestational week) |
|                                                                                                                                                                                 |                                                                                                                                                                                                                                                                                                                                                                                                                                         |                                                                               | be pregnant ____<br>circumference                                   |
| H04                                                                                                                                                                             | Have you been infected since pregnancy ____ 0. Does it jump to I01 1. Yes, what kind of infection ____ (1 Rubella 2 Measles 3<br>Cytomegalovirus infection 4 Others, please explain ____). Have used drugs ____ Yes Please complete the form below: 2. Not sure                                                                                                                                                                         |                                                                               |                                                                     |
| Drug name (1 specific name 2 unknown)                                                                                                                                           |                                                                                                                                                                                                                                                                                                                                                                                                                                         | Dosage and frequency of medication (how many tablets/bags, how often per day) | Number of days actually used in first medication (gestational week) |
|                                                                                                                                                                                 |                                                                                                                                                                                                                                                                                                                                                                                                                                         |                                                                               | be pregnant ____<br>circumference                                   |
| <b>Part three: The father of the fetus</b>                                                                                                                                      |                                                                                                                                                                                                                                                                                                                                                                                                                                         |                                                                               |                                                                     |
| <b>I. The health of the father of the fetus</b>                                                                                                                                 |                                                                                                                                                                                                                                                                                                                                                                                                                                         |                                                                               |                                                                     |
| I01                                                                                                                                                                             | How much does he weigh: ____ kg (kilograms) (Note: If over 150kg, fill in 150kg) How tall is he in centimeters: ____ cm<br>(father's weight and height to one decimal place)                                                                                                                                                                                                                                                            |                                                                               |                                                                     |
| <b>J. Fetal father's behavior</b>                                                                                                                                               |                                                                                                                                                                                                                                                                                                                                                                                                                                         |                                                                               |                                                                     |

|     |                                                                                                                                                                                                                                                                                                                                                                                                                                                                                                                                                                           |
|-----|---------------------------------------------------------------------------------------------------------------------------------------------------------------------------------------------------------------------------------------------------------------------------------------------------------------------------------------------------------------------------------------------------------------------------------------------------------------------------------------------------------------------------------------------------------------------------|
| J01 | <p>Did he ever smoke regularly? (At least one cigarette per day, continuous smoking for more than one month) 0. No 1. Yes→</p> <p>J02. When did he start smoking regularly? ____year ____ moon</p> <p>J03. How many cigarettes do you usually smoke a day when you often smoke? ____ Days/month</p> <p>J04. Has he stopped smoking regularly ____ 0. No (jump to J05) 1. Yes, stop time ____year ____ moon</p>                                                                                                                                                            |
| J05 | <p>Did he drink alcohol regularly (at least once a week on average)? ____ 0. No (end) 1. Yes→</p> <p>J06. When did he start drinking regularly? ____year ____ moon</p> <p>J07. How many times a month does he usually drink alcohol? How many ounces each time ____ Next/ month; ____ Two per session</p> <p>J08 What kind of wine does he drink most when he often drinks? (You can choose more than one) ____ A. Beer B. White wine C. Shochu D. Wine E. Spirits J09. Did he stop drinking regularly? 0 No, 1 Yes, How long did he stop drinking ____year ____ moon</p> |

End time of investigation (24-hour system): ☐ time ☐ component
