# Supplementary material for: Effects of environmental exposure and lifestyle behaviors on preterm birth and low birth weight among pregnant women in southwest China
Source: Research Square preprint supplement (doi:10.21203/rs.3.rs-7747091/v1), 2025-12-03
Supplement: Supplementary file 3 [file be016952b04950cfd3399a76.pdf]

Table 6. Pregnancy late term questionnaire

Natural Population Cohort Survey in Southwest  
China

( birth cohort )

Late Pregnancy Survey

|                                                                                                                                                                                                                                              |                                        |
|----------------------------------------------------------------------------------------------------------------------------------------------------------------------------------------------------------------------------------------------|----------------------------------------|
| Personal code:...-...-.....-□1-□0□4                                                                                                                                                                                                          |                                        |
| The first 1-2 digits from the left are the survey city (state) code, with a value unit of 0-9;                                                                                                                                               |                                        |
| The third and fourth digits are the code of the survey agency, with a value range of 0-9;                                                                                                                                                    |                                        |
| The 5th to 9th digits are the serial number of pregnant women surveyed, with a range of 0-9; each institution is numbered from 00001;                                                                                                        |                                        |
| The 10th digit is the identification code of the research subject (1 for mother), 2 for the first child, 3 for the second child (and so on for multiple births); the questionnaire for multiple births should be filled out for each birth.  |                                        |
| The 11th and 12th digits are the questionnaire number: baseline table 01, early pregnancy table 02, mid-pregnancy table 03, late pregnancy table 04, birth table 05, postpartum and infant table 06, six months table 07, one year table 08. |                                        |
| Name of pregnant woman:_____ Hospitalization: No□ Admitted□, admission number : _____                                                                                                                                                        |                                        |
| Pregnant ID number: □ □ □ □ □ □ □ □ □ □ □ □ □ □ □ □ □ □                                                                                                                                                                                      |                                        |
| Current gestational age: _____ Zhou Mobile phone number: _____                                                                                                                                                                               |                                        |
| Name of the survey institution: _____                                                                                                                                                                                                        |                                        |
| Investigators signature: _____                                                                                                                                                                                                               | date : _____ year _____ moon _____ sun |
| QC Officer signature: _____                                                                                                                                                                                                                  | date : _____ year _____ moon _____ sun |

Start time of investigation (24-hour system): ☐ time ☐ component

## Part I: Health Surveys

|              |                                                                                                                                                                                                                                                                                                  |                                    |                                     |                                   |
|--------------|--------------------------------------------------------------------------------------------------------------------------------------------------------------------------------------------------------------------------------------------------------------------------------------------------|------------------------------------|-------------------------------------|-----------------------------------|
| A01          | Have you had any vaginal bleeding during pregnancy (not counting "showing red" before delivery)? ____ 0.                                                                                                                                                                                         |                                    |                                     |                                   |
|              | No---jump to (A02) 1. Is the first bleeding time: ____ 1. Early Pregnancy 2. Mid-Pregnancy 3. Late Pregnancy                                                                                                                                                                                     |                                    |                                     |                                   |
|              | cause : ____ 1 Threatened abortion 2 Threatened preterm birth 3 Placenta previa 4 Placental abruption 5                                                                                                                                                                                          |                                    |                                     |                                   |
|              | Others, please specify; whether medication is used ____, 0 No (jump to A02) 1 Yes, ____ Type 2. Unclear                                                                                                                                                                                          |                                    |                                     |                                   |
| Name of drug |                                                                                                                                                                                                                                                                                                  | Dosage and frequency of medication | First medication (gestational week) | How many days are actually shared |
|              |                                                                                                                                                                                                                                                                                                  |                                    | be pregnant ____<br>circumference   |                                   |
|              |                                                                                                                                                                                                                                                                                                  |                                    | be pregnant ____<br>circumference   |                                   |
|              |                                                                                                                                                                                                                                                                                                  |                                    | be pregnant ____<br>circumference   |                                   |
|              |                                                                                                                                                                                                                                                                                                  |                                    | be pregnant ____<br>circumference   |                                   |
| A02          | Since the last questionnaire, have you experienced vomiting: ____                                                                                                                                                                                                                                |                                    |                                     |                                   |
|              | 0. No---jump to (A03) 1. Yes, mild (from the first trimester of pregnancy ____ Zhouji to the 1st ____ circumference )<br><br>2. Yes, severe (from the first trimester of pregnancy ____ Zhouji to the 1st ____ Week) whether medication was used ____, 0. No (jump to A03) 1 Yes, ____ a surname |                                    |                                     |                                   |
| Name of drug |                                                                                                                                                                                                                                                                                                  | Dosage and frequency of medication | First medication (gestational week) | How many days are actually shared |
|              |                                                                                                                                                                                                                                                                                                  |                                    | be pregnant ____<br>circumference   |                                   |
|              |                                                                                                                                                                                                                                                                                                  |                                    | be pregnant ____<br>circumference   |                                   |
|              |                                                                                                                                                                                                                                                                                                  |                                    | be pregnant ____<br>circumference   |                                   |
| A03          | Have you had a fever since becoming pregnant ____ 0 No (go to A04) 1 Yes                                                                                                                                                                                                                         |                                    |                                     |                                   |
|              | The highest temperature is __, last __ Heaven: Whether to use medication __, 0. No 1. Yes, _ Type 2. Unclear                                                                                                                                                                                     |                                    |                                     |                                   |
| Name of drug |                                                                                                                                                                                                                                                                                                  | Dosage and frequency of medication | First medication (gestational week) | How many days are actually shared |
|              |                                                                                                                                                                                                                                                                                                  |                                    | be pregnant ____<br>circumference   |                                   |
|              |                                                                                                                                                                                                                                                                                                  |                                    | be pregnant ____<br>circumference   |                                   |
|              |                                                                                                                                                                                                                                                                                                  |                                    | be pregnant ____<br>circumference   |                                   |
| A04          | Since the last questionnaire, have you had amniotic fluid diagnosis: _____                                                                                                                                                                                                                       |                                    |                                     |                                   |
|              | 0. No-jump to A05 1. Yes, reason _____ Time of amniocentesis: Day __ Pregnancy week diagnosis: _____                                                                                                                                                                                             |                                    |                                     |                                   |
| A05          | Since the last questionnaire, have you been told that you have gestational hypertension? ____ 0 No (please jump to A08) 1. Yes→                                                                                                                                                                  |                                    |                                     |                                   |

|                                                        |                                                                                                                                                                                                                                                                                                                                                                                                                                                                                                                                  |
|--------------------------------------------------------|----------------------------------------------------------------------------------------------------------------------------------------------------------------------------------------------------------------------------------------------------------------------------------------------------------------------------------------------------------------------------------------------------------------------------------------------------------------------------------------------------------------------------------|
|                                                        | <p>A06. Diagnostic time: _____year ____ moon ____ sun</p> <p>A07. Do you receive treatment for this (multiple choices)? ____ 0. No 1. Yes, dietary restrictions (e.g., no salt) 2. Yes, bed rest 3. Yes, hospital care 4. Yes, medication 5. Yes, other methods, please specify: _____</p>                                                                                                                                                                                                                                       |
| A08                                                    | <p>Since the last questionnaire, have your doctor informed you of having preeclampsia? ____ 0. No (please jump to A11) 1. Yes → A09. Diagnostic time: ____year ____ moon ____ sun</p> <p>A10. Do you receive treatment for this (multiple answers)? ____ 0. No 1. Yes, dietary restriction 2. Yes, bed rest 3. Yes, hospital care 4. Yes, medication 5. Yes, other methods, please indicate: _____</p>                                                                                                                           |
| A11                                                    | <p>Since the last questionnaire, have you been told by your doctor that you have eclampsia? ____ 0 No (please jump to A14) 1. Yes→</p> <p>A12. Diagnostic time: _____year ____ moon ____ sun</p> <p>A13. Do you receive treatment for this (multiple answers)? ____ 0. No 1. Yes, dietary restriction 2. Yes, bed rest 3. Yes, hospital care 4. Yes, medication 5. Yes, other methods, please indicate: _____</p>                                                                                                                |
| A14                                                    | <p>Since the last questionnaire, have you been told that you have gestational diabetes? ____ 0 No (please jump to A18) 1. Yes→</p> <p>A15. Diagnostic time: ____year ____ moon ____ A16. The diagnosed diseases are: ____ 1. Diabetes mellitus with pregnancy 2. Gestational diabetes mellitus</p> <p>A17. Have you received treatment for this (multiple answers)? ____ 0. No 1. Yes, diet control 2. Yes, exercise 3. Yes, drug therapy, please indicate: ____ 1). Insulin 2). Metformin 3). Others 4. Yes, inpatient care</p> |
| A18                                                    | <p>Have you been vaccinated since becoming pregnant? _____</p> <p>0. No (please jump to A19) 1. Yes: Please fill in the name of the vaccine _____ Not clear, time of inoculation: _____year ____ moon</p>                                                                                                                                                                                                                                                                                                                        |
| A19                                                    | <p>Whether there are pregnancy complications or comorbidities during pregnancy: _____</p> <p>0. No 1. Yes: Please select the specific disease: _____</p> <p>1. Gestational hypothyroidism 2. Gestational hyperthyroidism 3. Intrahepatic cholestasis of pregnancy</p> <p>4. Anemia in pregnancy (select the specific name ____ 4.1 Iron deficiency anemia 4.2 Thalassemia 4.3 Others) 5. Others</p>                                                                                                                              |
| <b>Part II: Behavioral and environmental exposures</b> |                                                                                                                                                                                                                                                                                                                                                                                                                                                                                                                                  |
| <b><u>A. smoke</u></b>                                 |                                                                                                                                                                                                                                                                                                                                                                                                                                                                                                                                  |
| A01                                                    | <p>Since the last time you filled out the questionnaire, have you ever smoked? ____ (At least one cigarette per day, smoking continuously for more than one month) 0. No (Please jump to A05) 1. Yes → A02. When did you start smoking: ____year ____ Month (please fill in the date after the last survey) A03. Have you stopped smoking? 0 No 1 Yes, when: ____year ____ Month (if not finished, leave blank)</p> <p>A04. How many cigarettes do you smoke a day? ____ Days/month</p>                                          |

| A05                        | <p>Since the last questionnaire, have you ever been exposed to a smoking environment? ____ 0 No (please jump to B01) 1. Yes → A06. Has your husband ever smoked in front of you? ____ 0 No (please jump to A10) 1 Yes</p> <p>A07. How long do you usually smoke in front of you every day? ____ Hours/day</p> <p>A08. When to start smoking in front of you: ____ Year ____ Month (please fill in the date after the last survey)</p> <p>A09. Whether to end smoking in front of you ____ 0. No 1. Yes end time: ____ year ____ Month (if not finished, leave blank)</p> <p>A10. Do people smoke in front of you in your work environment and in public places you go to? ____ 0 No (please jump to B01) 1. Yes A11. Average weekly exposure to smoke ____ Hours/week</p>                                                                                                                                                                                                                                                                                     |                 |           |                 |           |  |  |                    |  |  |              |  |  |           |  |  |
|----------------------------|---------------------------------------------------------------------------------------------------------------------------------------------------------------------------------------------------------------------------------------------------------------------------------------------------------------------------------------------------------------------------------------------------------------------------------------------------------------------------------------------------------------------------------------------------------------------------------------------------------------------------------------------------------------------------------------------------------------------------------------------------------------------------------------------------------------------------------------------------------------------------------------------------------------------------------------------------------------------------------------------------------------------------------------------------------------|-----------------|-----------|-----------------|-----------|--|--|--------------------|--|--|--------------|--|--|-----------|--|--|
| <b><u>B. drink</u></b>     |                                                                                                                                                                                                                                                                                                                                                                                                                                                                                                                                                                                                                                                                                                                                                                                                                                                                                                                                                                                                                                                               |                 |           |                 |           |  |  |                    |  |  |              |  |  |           |  |  |
| B01                        | <p>Since the last time you filled out the questionnaire, do you drink alcohol regularly? ____ (average of at least 1 time per week) 0. No (please jump to C01) 1. Yes →</p> <p>B02. When to start drinking: ____ year ____ Month (please fill in the date after the last survey)</p> <p>B03. Whether to stop drinking alcohol 0 No (go to C01) 1 Yes Stop drinking time: ____ year ____ moon</p> <p>For the following types of alcohol, how many times a week do you drink on average? How many ounces do you drink each time?</p> <table border="1" style="margin-left: auto; margin-right: auto; border-collapse: collapse; text-align: center;"> <thead> <tr> <th style="width: 30%;">Wine varieties</th> <th style="width: 30%;">Next/Week</th> <th style="width: 30%;">Two per session</th> </tr> </thead> <tbody> <tr> <td>B04. Beer</td> <td></td> <td></td> </tr> <tr> <td>B05. Foreign wines</td> <td></td> <td></td> </tr> <tr> <td>B06. Spirits</td> <td></td> <td></td> </tr> <tr> <td>B07. Wine</td> <td></td> <td></td> </tr> </tbody> </table> | Wine varieties  | Next/Week | Two per session | B04. Beer |  |  | B05. Foreign wines |  |  | B06. Spirits |  |  | B07. Wine |  |  |
| Wine varieties             | Next/Week                                                                                                                                                                                                                                                                                                                                                                                                                                                                                                                                                                                                                                                                                                                                                                                                                                                                                                                                                                                                                                                     | Two per session |           |                 |           |  |  |                    |  |  |              |  |  |           |  |  |
| B04. Beer                  |                                                                                                                                                                                                                                                                                                                                                                                                                                                                                                                                                                                                                                                                                                                                                                                                                                                                                                                                                                                                                                                               |                 |           |                 |           |  |  |                    |  |  |              |  |  |           |  |  |
| B05. Foreign wines         |                                                                                                                                                                                                                                                                                                                                                                                                                                                                                                                                                                                                                                                                                                                                                                                                                                                                                                                                                                                                                                                               |                 |           |                 |           |  |  |                    |  |  |              |  |  |           |  |  |
| B06. Spirits               |                                                                                                                                                                                                                                                                                                                                                                                                                                                                                                                                                                                                                                                                                                                                                                                                                                                                                                                                                                                                                                                               |                 |           |                 |           |  |  |                    |  |  |              |  |  |           |  |  |
| B07. Wine                  |                                                                                                                                                                                                                                                                                                                                                                                                                                                                                                                                                                                                                                                                                                                                                                                                                                                                                                                                                                                                                                                               |                 |           |                 |           |  |  |                    |  |  |              |  |  |           |  |  |
| <b><u>C. drink tea</u></b> |                                                                                                                                                                                                                                                                                                                                                                                                                                                                                                                                                                                                                                                                                                                                                                                                                                                                                                                                                                                                                                                               |                 |           |                 |           |  |  |                    |  |  |              |  |  |           |  |  |
| C01                        | <p>Since the last time you filled out the questionnaire, do you drink tea often? ____ (For example, at least 3 times a week) 0. No (Please jump to D01) 1. Yes →</p> <p>C02. When to start drinking tea: ____ year ____ Month (please fill in the date after the last survey)</p> <p>C03. Whether to stop drinking tea ____ 0 No (go to D01) 1 is the end of tea time ____ year ____ moon</p> <p>C04. What kind of tea do you drink? (Choose one) ____ 1. Green tea 2. Black tea 3. Oolong tea 4. Camellia sinensis 5. Pu'er tea 6. Black tea The amount of green tea is similar 7. White tea 8. Camellia sinensis The amount of green tea is similar 9. Camellia sinensis The amount of black tea is similar 10. Others</p>                                                                                                                                                                                                                                                                                                                                  |                 |           |                 |           |  |  |                    |  |  |              |  |  |           |  |  |
| <b><u>D. alima</u></b>     |                                                                                                                                                                                                                                                                                                                                                                                                                                                                                                                                                                                                                                                                                                                                                                                                                                                                                                                                                                                                                                                               |                 |           |                 |           |  |  |                    |  |  |              |  |  |           |  |  |
| D01                        | <p>Since the last questionnaire, do you take vitamin or mineral supplements regularly? 0. No (go to D02) 1. Yes → ____ (like folic acid, Fufu, calcium tablets, iron supplements and so on)</p>                                                                                                                                                                                                                                                                                                                                                                                                                                                                                                                                                                                                                                                                                                                                                                                                                                                               |                 |           |                 |           |  |  |                    |  |  |              |  |  |           |  |  |
| D02                        | <p>Please write down the name of the vitamin or mineral supplement you take regularly, when you take it and how often you usually take it a week.</p> <p>1.folic acid ____ (1 folic acid tablets, 2 Ailewei, 3 Materna 4 others 5 unknown), weekly ____ Next, co-servicing ____ circumference</p>                                                                                                                                                                                                                                                                                                                                                                                                                                                                                                                                                                                                                                                                                                                                                             |                 |           |                 |           |  |  |                    |  |  |              |  |  |           |  |  |

|                                                                                           |                                                                                                                                                                                                                                                                                                                                                                                                                                                                                                                                                                                                                                               |                               |                               |
|-------------------------------------------------------------------------------------------|-----------------------------------------------------------------------------------------------------------------------------------------------------------------------------------------------------------------------------------------------------------------------------------------------------------------------------------------------------------------------------------------------------------------------------------------------------------------------------------------------------------------------------------------------------------------------------------------------------------------------------------------------|-------------------------------|-------------------------------|
|                                                                                           | 2. Financial Aid for the TOEFL____(1 Other 2 Not known), weekly____Next, co-servicing____circumference<br><br>3.calcium tablet ____ (1 calcium carbonate D3 tablets 2 calcium carbonate D3 granules 3 calcium acetate capsules 4 calcium lactate granules 5 calcium gluconate zinc oral solution 6 others 7 unknown), weekly____Next, co-servicing____circumference<br><br>4.chalybeate ____ (1 dextran iron oral solution 2 ferrous lactate capsules 3 iron succinate oral solution 4 ferrous succinate sustained-release tablets 5 others 6 unknown), weekly____Next, co-servicing____circumference<br><br>5. Other: Please indicate: _____ |                               |                               |
| <b><u>E. Sports activities and electronic product use</u></b>                             |                                                                                                                                                                                                                                                                                                                                                                                                                                                                                                                                                                                                                                               |                               |                               |
| E01                                                                                       | Since the last time you filled out the questionnaire, how often do you walk on average per week ____hour ;                                                                                                                                                                                                                                                                                                                                                                                                                                                                                                                                    |                               |                               |
| E02                                                                                       | Since the last questionnaire, have you been physically active (at least 3 times a week for at least 30 minutes each time, excluding walking)____ 0 No 1 Yes                                                                                                                                                                                                                                                                                                                                                                                                                                                                                   |                               |                               |
| E03                                                                                       | Since the last time you filled out the survey, your average phone usage ____ hour                                                                                                                                                                                                                                                                                                                                                                                                                                                                                                                                                             |                               |                               |
| E04                                                                                       | Since the last time we filled out the survey, you average how much you use a tablet____ hour                                                                                                                                                                                                                                                                                                                                                                                                                                                                                                                                                  |                               |                               |
| E05                                                                                       | Do you leave your phone, tablet or other electronic devices near you at night, such as on your bed/bedside table ____ 0 No (please jump to E06)<br><br>1. Yes (the status of the electronic product is ____ A. Turn off B. Turn on C. Charge D. Flight mode)                                                                                                                                                                                                                                                                                                                                                                                  |                               |                               |
| E06                                                                                       | Since the last time you filled out the questionnaire, how many days on average have you used a computer____hour                                                                                                                                                                                                                                                                                                                                                                                                                                                                                                                               |                               |                               |
| E07                                                                                       | Since the last time you filled out the questionnaire, how many hours on average do you watch TV per day ____hour                                                                                                                                                                                                                                                                                                                                                                                                                                                                                                                              |                               |                               |
| E08                                                                                       | Have you worn a radiation suit since the last questionnaire? ____ 0 No (please jump to F01) 1 Yes                                                                                                                                                                                                                                                                                                                                                                                                                                                                                                                                             |                               |                               |
| E09                                                                                       | Since the last questionnaire, how long on average have you worn a radiation suit per day? __ hour                                                                                                                                                                                                                                                                                                                                                                                                                                                                                                                                             |                               |                               |
| <b><u>F. occupational exposure</u></b>                                                    |                                                                                                                                                                                                                                                                                                                                                                                                                                                                                                                                                                                                                                               |                               |                               |
| F01                                                                                       | Have you been working since the last time you filled out the questionnaire____ 0 No (please jump to G01) 1. Yes →<br><br>Have you changed jobs or positions____0. No (please jump to F10) 1. Yes (1 time <input type="checkbox"/> 2 Next <input type="checkbox"/> )                                                                                                                                                                                                                                                                                                                                                                           |                               |                               |
| Please fill in the information about your work since you last completed the questionnaire |                                                                                                                                                                                                                                                                                                                                                                                                                                                                                                                                                                                                                                               |                               |                               |
| Title                                                                                     | question                                                                                                                                                                                                                                                                                                                                                                                                                                                                                                                                                                                                                                      | Latest new job                | Last new job                  |
| F02                                                                                       | Name of your work unit                                                                                                                                                                                                                                                                                                                                                                                                                                                                                                                                                                                                                        |                               |                               |
| F03                                                                                       | Address of your work unit                                                                                                                                                                                                                                                                                                                                                                                                                                                                                                                                                                                                                     | _market _distinguish __street | _market _distinguish __street |
| F04                                                                                       | What is your job position?                                                                                                                                                                                                                                                                                                                                                                                                                                                                                                                                                                                                                    |                               |                               |
| F05                                                                                       | Please describe the specific tasks of your work                                                                                                                                                                                                                                                                                                                                                                                                                                                                                                                                                                                               |                               |                               |
| F06                                                                                       | When did you start this job?                                                                                                                                                                                                                                                                                                                                                                                                                                                                                                                                                                                                                  | __year __moon                 | __year __moon                 |

|                                                                                                                    |                                                                                                                                                                                                                                                                                                                                                                                                                                                          |                                                                  |                                                                  |
|--------------------------------------------------------------------------------------------------------------------|----------------------------------------------------------------------------------------------------------------------------------------------------------------------------------------------------------------------------------------------------------------------------------------------------------------------------------------------------------------------------------------------------------------------------------------------------------|------------------------------------------------------------------|------------------------------------------------------------------|
| F07                                                                                                                | When did you finish this job? (If not finished, fill in)                                                                                                                                                                                                                                                                                                                                                                                                 | __year __moon                                                    | __year __moon                                                    |
| F08                                                                                                                | Which of the following best describes the intensity of physical activity required for your job?                                                                                                                                                                                                                                                                                                                                                          | 1. Sitting dominates 2. Small amounts<br>3. Intermediate 4. High | 1. Sitting dominates 2. Small amounts<br>3. Intermediate 4. High |
| F09                                                                                                                | Whether your work requires an overnight shift                                                                                                                                                                                                                                                                                                                                                                                                            | 0. No 1 Yes                                                      | 0. No 1 Yes                                                      |
| F10                                                                                                                | <p>Have your working hours changed since the last questionnaire_____</p> <p>(0 No-jump to F11 1 is (1 time 2 times 3 times)) (Fill in as many times as the number of changes): From the first pregnancy..._____ The Thoughtful Pregnancy_____ Zhou, working daily_____hour</p> <p>Since becoming pregnant_The Thoughtful Pregnancy_Zhou, working daily_____hour</p> <p>Since becoming pregnant_The Thoughtful Pregnancy_Zhou, working daily_____hour</p> |                                                                  |                                                                  |
| F11                                                                                                                | <p>What is your most commonly used transportation for work and travel? (Multiple choices)_</p> <p>A. Walking B. Bicycle/electric vehicle C. Bus D. Subway E. Car F. Bicycle</p>                                                                                                                                                                                                                                                                          |                                                                  |                                                                  |
| F12                                                                                                                | How long does it take you to get from home to work: __hour                                                                                                                                                                                                                                                                                                                                                                                               |                                                                  |                                                                  |
| F13                                                                                                                | Since the last questionnaire, work in noisy factories, bars or frequent exposure to loud noise: _____0 No 1 Yes                                                                                                                                                                                                                                                                                                                                          |                                                                  |                                                                  |
| F14                                                                                                                | How loud is the noise: _____1. Most of the time it is not large 2. Can hear the sound of speech, the noise is loud 3. Can not hear the sound of speech, can tolerate 4. Can not hear the sound of speech, the noise is unbearable 5. Uncertain                                                                                                                                                                                                           |                                                                  |                                                                  |
| F15                                                                                                                | Since the last questionnaire, have been exposed to dust in work (including field work):_____0. No 1. Yes 2. Don't know                                                                                                                                                                                                                                                                                                                                   |                                                                  |                                                                  |
| F16                                                                                                                | Since the last questionnaire, exposure to harmful gases at work (including field work):_____0 No 1 Yes 2. Don't know                                                                                                                                                                                                                                                                                                                                     |                                                                  |                                                                  |
| <b>G. Living conditions</b>                                                                                        |                                                                                                                                                                                                                                                                                                                                                                                                                                                          |                                                                  |                                                                  |
| G01                                                                                                                | Have you moved since the last questionnaire? _____0 No (please jump to G15) 1 Yes                                                                                                                                                                                                                                                                                                                                                                        |                                                                  |                                                                  |
| Please fill in the following information about your place of residence since you last completed the questionnaire: |                                                                                                                                                                                                                                                                                                                                                                                                                                                          |                                                                  |                                                                  |
| Title                                                                                                              | question                                                                                                                                                                                                                                                                                                                                                                                                                                                 | (1) Current residence                                            | (2) Last residence                                               |
| G02                                                                                                                | Name of city, district and street                                                                                                                                                                                                                                                                                                                                                                                                                        | market : __distinguish : __street                                | market : __distinguish : __street                                |
| G03                                                                                                                | Start time of residence                                                                                                                                                                                                                                                                                                                                                                                                                                  | __year __moon __sun                                              | __year __moon __sun                                              |
| G04                                                                                                                | floor space                                                                                                                                                                                                                                                                                                                                                                                                                                              | 2 __m                                                            | 2 __m                                                            |
| G05                                                                                                                | Residential floor                                                                                                                                                                                                                                                                                                                                                                                                                                        | _____layer                                                       | _____layer                                                       |
| G06                                                                                                                | The residence is close to the main traffic road (four lanes in both directions)                                                                                                                                                                                                                                                                                                                                                                          | 1. <50m 2. 50-100m<br>3. 101-150m 4. >150m                       | 1. <50m 2. 50-100m<br>3. 101-150m 4. >150m                       |

|     |                                                                                                          |                                                                                                                                                             |                                                                                                                  |
|-----|----------------------------------------------------------------------------------------------------------|-------------------------------------------------------------------------------------------------------------------------------------------------------------|------------------------------------------------------------------------------------------------------------------|
| G07 | What kind of fuel do you mainly use to cook at this residence?                                           | 1. Gas or natural gas 2. Coal briquettes or coal lumps<br><br>3. Electric or induction cooker 4 Other<br>_____                                              | 1. Gas or natural gas 2. Coal briquettes or coal lumps<br><br>3. Electric or induction cooker 4. Others<br>_____ |
| G08 | What is the cooking oil you use most often at home?                                                      | 1. Vegetable oil 2. Lard 3. Peanut oil<br><br>4. Soybean oil 5. Blended oil 6. Other oils                                                                   | 1. Vegetable oil 2. Lard 3. Peanut oil<br><br>4. Soybean oil 5. Blended oil 6. Other oils                        |
| G09 | Do you use a range hood when cooking?                                                                    | 0. No 1 Yes                                                                                                                                                 | 0. No 1 Yes                                                                                                      |
| G10 | The time when the last decoration was finished (if you don't know the month and day, you can fill in 99) | __year __moon __sun                                                                                                                                         | __year __moon __sun                                                                                              |
| G11 | The decoration materials used in your home (multiple choices)                                            | A Paint B Wallpaper C Wood Panel D<br>Glue E Solid Wood F Marble G Granite<br><br>I Other (specify) _____                                                   | A Paint B Wallpaper C Wood Panel D<br>Glue E Solid Wood F Marble G Granite<br><br>I Other (specify) _____        |
| G12 | Can you smell the decoration when you move in after decorating your house?                               | Mild refers to the smell of decoration, moderate refers to the irritation and pungency, and severe refers to the occurrence of dizziness and other symptoms |                                                                                                                  |
|     |                                                                                                          | 0. No 1. Mild 2. Moderate 3. Severe                                                                                                                         | 0. No 1. Mild 2. Moderate 3. Severe                                                                              |
| G13 | Last time furniture was added (not sure to fill in 99)                                                   | __year __moon __sun                                                                                                                                         | __year __moon __sun                                                                                              |
| G14 | Materials of your furniture (multiple choices)                                                           | A artificial board B solid wood C<br>glass D others                                                                                                         | A artificial board B solid wood C<br>glass D others                                                              |
| G15 | How long your house has its Windows open                                                                 | Working days: __ hours/day;<br><br>Non-working day: __ hours/day                                                                                            | Working days: __ hours/day;<br><br>Non-working day: __ hours/day                                                 |
| G16 | Does your home use air purification facilities                                                           | 0. No (please jump to G18) 1. Yes                                                                                                                           | 0. No (please jump to G18) 1. Yes                                                                                |
| G17 | How long your home has been using air purification facilities                                            | Working days: __ hours/day;<br><br>Non-working day: __ hours/day                                                                                            | Working days: __ hours/day;<br><br>Non-working day: __ hours/day                                                 |
| G18 | Does your home have heating (including air conditioning, electric heaters, coal stoves, etc.)            | 0. No (please jump to G22) 1. Yes                                                                                                                           | 0. No (please jump to G22) 1. Yes                                                                                |
| G19 | When your home heating started                                                                           | __year __moon __sun                                                                                                                                         | __year __moon __sun                                                                                              |

|                                       |                                                                                                                                                                                                                                                                                                                                                                                                              |                                                                                                                             |                                                                                                                             |
|---------------------------------------|--------------------------------------------------------------------------------------------------------------------------------------------------------------------------------------------------------------------------------------------------------------------------------------------------------------------------------------------------------------------------------------------------------------|-----------------------------------------------------------------------------------------------------------------------------|-----------------------------------------------------------------------------------------------------------------------------|
| G20                                   | When your home heating ends                                                                                                                                                                                                                                                                                                                                                                                  | __year __moon __sun                                                                                                         | __year __moon __sun                                                                                                         |
| G21                                   | Please choose your home heating method: (multiple choices)                                                                                                                                                                                                                                                                                                                                                   | A coal stove, with chimney B coal stove, without chimney C electric heating D air conditioning E others<br>_____            | A coal stove, with chimney B coal stove, without chimney C electric heating D air conditioning E others<br>_____            |
| G22                                   | Do you have pets at home                                                                                                                                                                                                                                                                                                                                                                                     | 0. No 1. Yes, the pet is _____                                                                                              | 0. No 1. Yes, the pet is _____                                                                                              |
| G23                                   | Are there any places around your home (within a radius of one kilometer from the residence) that pollute the air? ____ (Choose more than one)                                                                                                                                                                                                                                                                | A. No B. There is a power plant C. There is a smelter D. There is a chemical plant E. There is a gas station F. Others ____ | A. No B. There is a power plant C. There is a smelter D. There is a chemical plant E. There is a gas station F. Others ____ |
| G24                                   | <p>Since the last questionnaire, how many hours on average you spend cooking (breakfast, lunch and dinner) per week at home:</p> <p>Since becoming pregnant_The Thoughtful Pregnancy_Zhou, cooking weekly__hour</p> <p>Since becoming pregnant_The Thoughtful Pregnancy_Zhou, cooking weekly__hour</p>                                                                                                       |                                                                                                                             |                                                                                                                             |
| G25                                   | <p>Since the last questionnaire, your average weekly time spent cooking (breakfast, lunch, dinner) is:</p> <p>Since becoming pregnant_The Thoughtful Pregnancy_Zhou, you cook every week__hour</p> <p>Since becoming pregnant_The Thoughtful Pregnancy_Zhou, you cook every week__hour</p>                                                                                                                   |                                                                                                                             |                                                                                                                             |
| G26                                   | <p>Since the last time the questionnaire was filled out, what is your average daily time spent at home? ____ (Including sleep and other activity time)</p> <p>Since becoming pregnant____The Thoughtful Pregnancy____Week, stay at home weekly weekday____Hours of rest____hour</p> <p>Since becoming pregnant____The Thoughtful Pregnancy____Week, stay at home weekly weekday____Hours of rest____hour</p> |                                                                                                                             |                                                                                                                             |
| G27                                   | Is there any elderly person (both parents) in the family to take care of you during this pregnancy? ____ (0. No 1. Yes) Do you live with your parents? ____ (0. No 1. Yes)                                                                                                                                                                                                                                   |                                                                                                                             |                                                                                                                             |
| G28                                   | Since the last time you filled out the questionnaire, have you dyed or permed your hair? ____ 0 No 1 Yes                                                                                                                                                                                                                                                                                                     |                                                                                                                             |                                                                                                                             |
| G29                                   | Since the last time you filled out the questionnaire, do you often wear makeup? 0. No 1. Yes (including contact with lipstick, nail polish, cosmetics, etc.)_                                                                                                                                                                                                                                                |                                                                                                                             |                                                                                                                             |
| <b>Part III. Prenatal education</b>   |                                                                                                                                                                                                                                                                                                                                                                                                              |                                                                                                                             |                                                                                                                             |
| H01                                   | Did you do fetal education for your baby during pregnancy? ____ 0 No (please jump to I1) 1 Yes                                                                                                                                                                                                                                                                                                               |                                                                                                                             |                                                                                                                             |
| H02                                   | When did you start doing fetal education? ____ 1. Within the first 13 weeks of pregnancy 2. Between the 14th and 26th weeks of pregnancy 3. After the 26th week of pregnancy                                                                                                                                                                                                                                 |                                                                                                                             |                                                                                                                             |
| H03                                   | How often do you give birth to a baby? _                                                                                                                                                                                                                                                                                                                                                                     |                                                                                                                             |                                                                                                                             |
| H04                                   | What prenatal education have you done for your baby? ____ 1. Sing to the baby, listen to music 2. Read to the baby, talk to the baby 3. Touch the fetus, interactive games 4. Appreciate literary and artistic works by yourself 5. Light the abdomen to stimulate the fetus 6. Others, please explain                                                                                                       |                                                                                                                             |                                                                                                                             |
| H05                                   | Did your husband participate in fetal education? ____ 1. Participated, he was very enthusiastic about fetal education 2. Participated, but his enthusiasm was mediocre 3. Not participated                                                                                                                                                                                                                   |                                                                                                                             |                                                                                                                             |
| <b>Part IV Pittsburgh Sleep Scale</b> |                                                                                                                                                                                                                                                                                                                                                                                                              |                                                                                                                             |                                                                                                                             |



| sleep quality |                                                                                                      | not<br>have                                                 | <1 time per<br>week | 1-2 times per<br>week | ≥3 times per<br>week |
|---------------|------------------------------------------------------------------------------------------------------|-------------------------------------------------------------|---------------------|-----------------------|----------------------|
| I01           | Difficulty falling asleep at night (can not fall asleep within 30 minutes)                           |                                                             |                     |                       |                      |
| I02           | Waking up easily or early at night                                                                   |                                                             |                     |                       |                      |
| I03           | Get up at night to go to the bathroom                                                                |                                                             |                     |                       |                      |
| I04           | You can't breathe properly at night                                                                  |                                                             |                     |                       |                      |
| I05           | Coughing or snoring at night                                                                         |                                                             |                     |                       |                      |
| I06           | Feel cold at night while sleeping                                                                    |                                                             |                     |                       |                      |
| I07           | It feels too hot to sleep at night                                                                   |                                                             |                     |                       |                      |
| I08           | Have nightmares at night                                                                             |                                                             |                     |                       |                      |
| I09           | Pain and discomfort during sleep at night                                                            |                                                             |                     |                       |                      |
| I10           | Other conditions that affect nighttime sleep (if yes, please state _____ )                           |                                                             |                     |                       |                      |
| I11           | Need to take medication (including from a doctor's prescription or over-the-counter) to fall asleep? |                                                             |                     |                       |                      |
| I12           | It is difficult to stay awake while driving, eating or participating in social activities            |                                                             |                     |                       |                      |
| I13           | How do you feel about your sleep quality at <u>night</u> ?                                           | 1. Very good 2. Good 3. Poor 4. Very poor                   |                     |                       |                      |
| I14           | Do you have difficulty in actively accomplishing <u>things</u> ?                                     | 1.No 2. One point 3. Relatively difficult 4. Very difficult |                     |                       |                      |

**End time of survey(24-hour system): ... .. minutes**
